# Supplementary material for: Biocompatible alkyne arms containing Schiff base fluorescence indicator for dual detection of CdII and PbII at physiological pH and its application to live cell imaging
Source: Royal Society of Chemistry journal article supplement (doi:10.1039/d0an00862a), 2020-01-01
Supplement: d0an00862a1.pdf [file d0an00862a1.pdf]

## **Biocompatible Alkyne arms containing Schiff base Fluorescence Indicator for Dual detection of Cd<sup>II</sup> and Pb<sup>II</sup> at Physiological pH and its Application to Live Cell Imaging**

S.G. Jebastin Andrews,<sup>†</sup> S. Benita Jeba Silviya,<sup>†</sup> Dharmaraj Jeyanthi,<sup>†</sup> E. Sathya Devi,<sup>†</sup> J. Winfred Jebaraj,<sup>§</sup> and Chithiraivel Balakrishnan<sup>\*,†</sup>

<sup>†</sup>Department of Chemistry, Nazareth Margoschis College at Pillaiyanmanai, Nazareth - 628 617, Thoothukudi District, Tamil Nadu, India

<sup>§</sup>Department of Chemistry, St.John's College, Palayamkottai, Tirunelveli, Tamilnadu, India

\*Corresponding Author

Tel: +91 7845061380

E-mail: [balac0735@gmail.com](mailto:balac0735@gmail.com); [pcvelbala@gmail.com](mailto:pcvelbala@gmail.com)

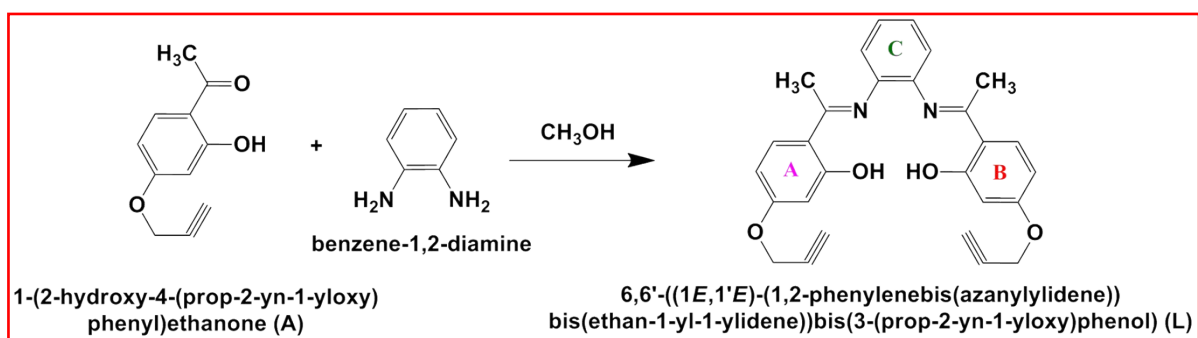

**Scheme S1.** Synthetic scheme for L.

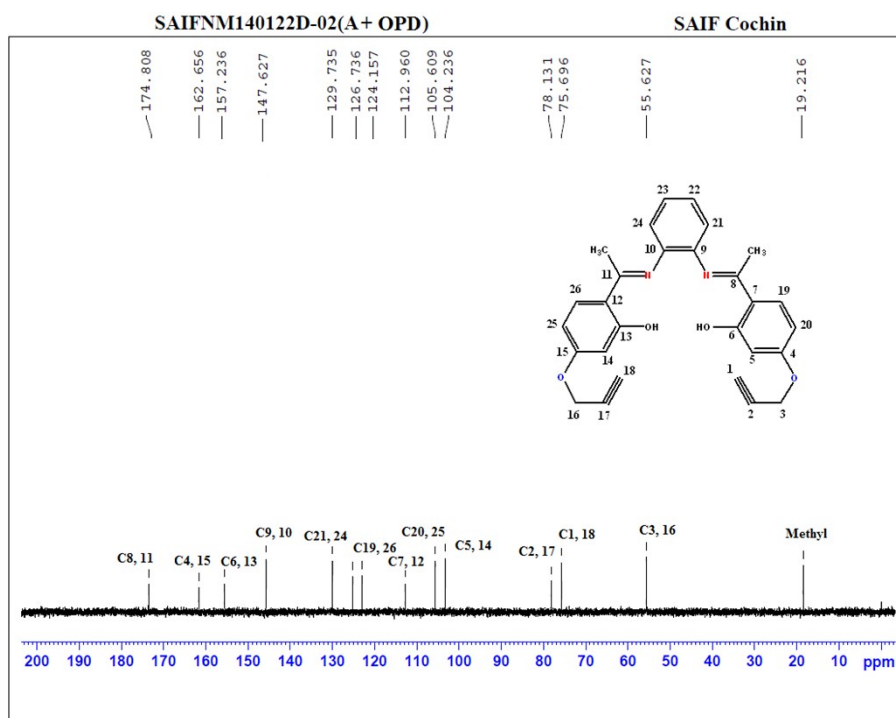

**Fig. S1.** <sup>13</sup>C NMR spectrum of H<sub>2</sub>L.

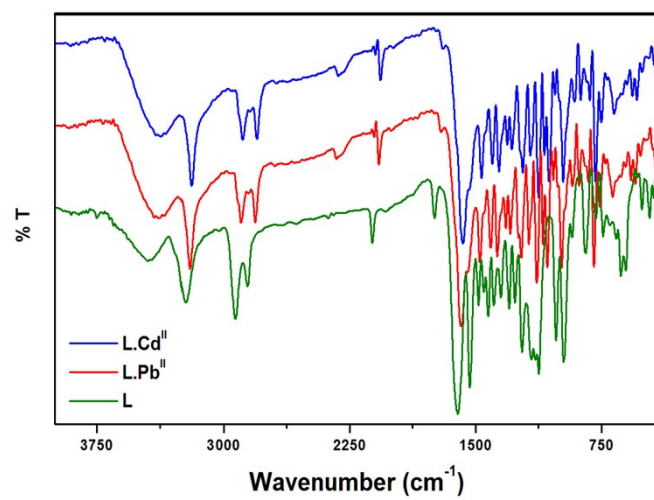

**Fig. S2.**FT-IR spectra of H<sub>2</sub>L and its complexes, L.Cd<sup>II</sup> and L.Pb<sup>II</sup>)

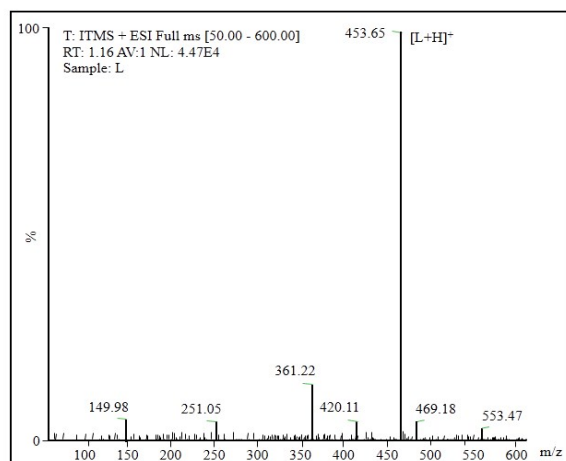

(a)

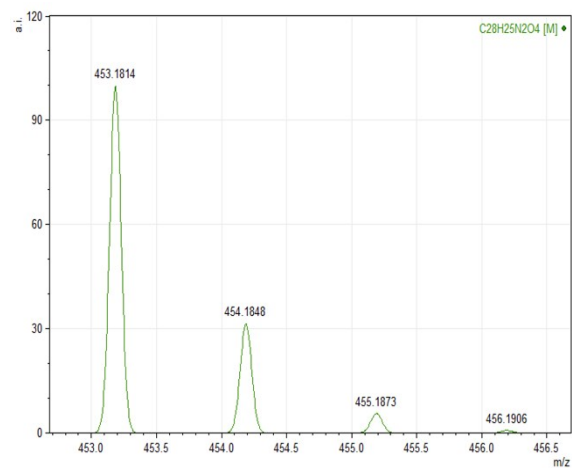

(b)

**Fig. S3.**ESI-mass spectra of compound H<sub>2</sub>L, **(a)** experimental; **(b)** simulated.

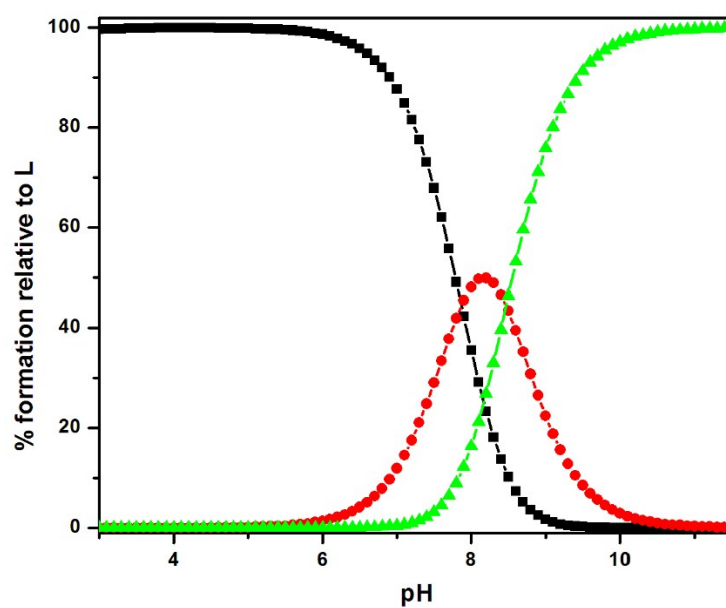

**Fig.S4.** Protonation equilibria diagram of  $H_2L$  ( $C_L = 0.003$  M) in methanol/HEPES buffer (5 mM, pH 7.3; 1:9 v/v).

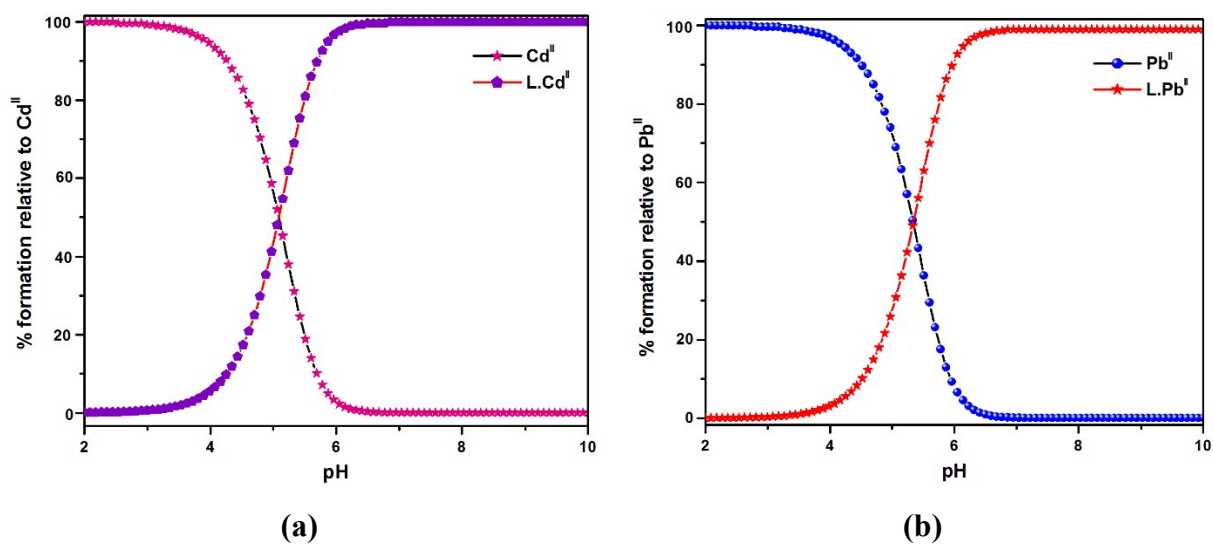

**Fig. S5.** Species distribution diagram of (a)  $\text{L.Cd}^{\text{II}}$  and (b)  $\text{L.Pb}^{\text{II}}$  complex equilibria in methanol/HEPES buffer (5 mM, pH 7.3; 1:9 v/v).

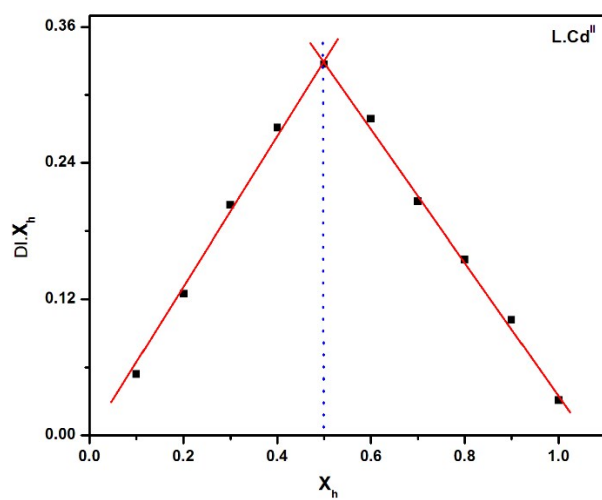

(a)

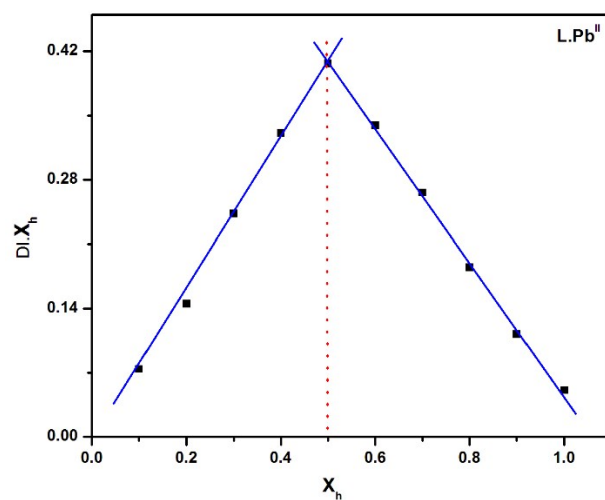

(b)

**Fig. S6.** Job's plot analysis  $\text{H}_2\text{L}$  with (a)  $\text{Cd}^{\text{II}}$  and (b)  $\text{Pb}^{\text{II}}$ .



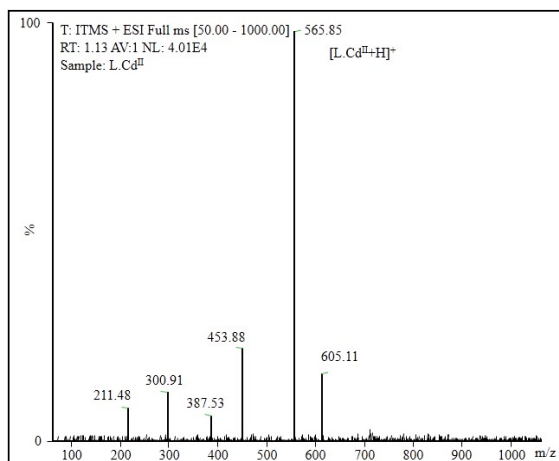

(a)

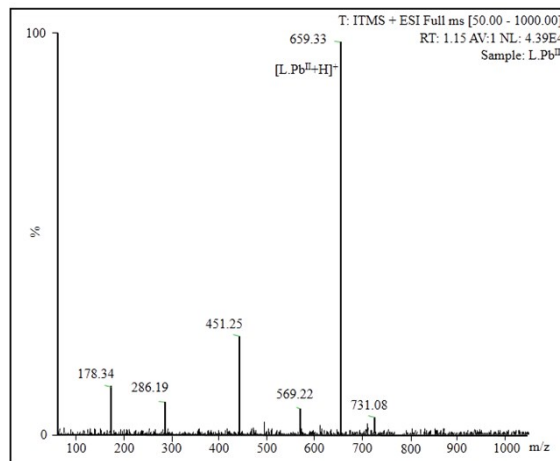

(c)

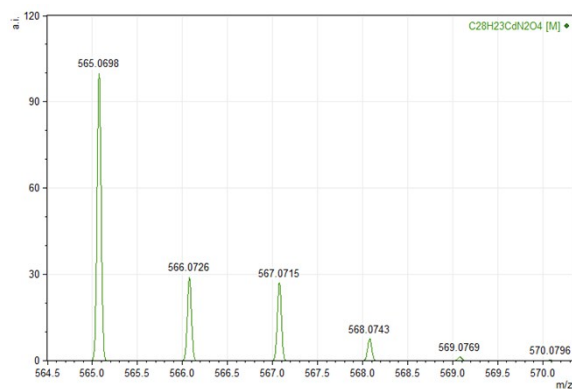

(b)

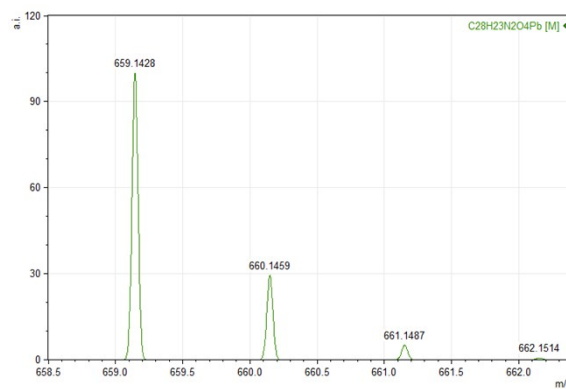

(d)

**Fig. S7.**ESI-mass spectra of (a) experimental L.CdII; (b) simulated L.CdII; (c) experimental L.PbII and (d) simulated L.PbII.

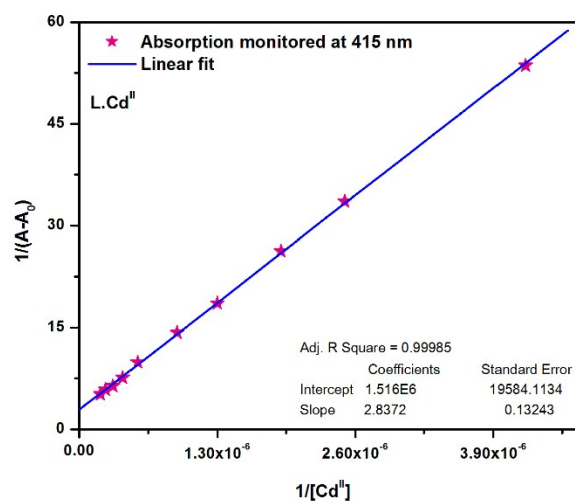

(a)

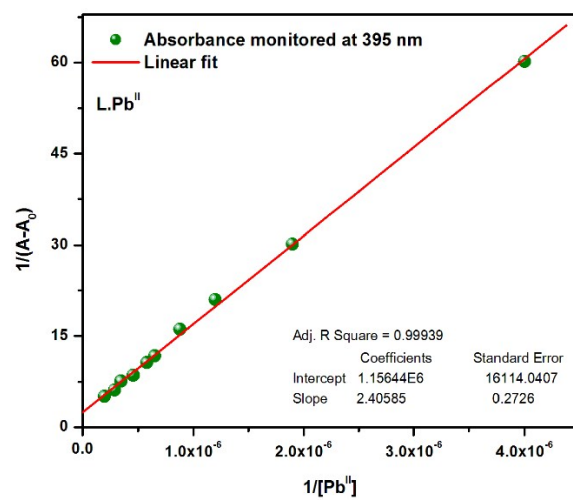

(b)

**Fig.S8.** B-H plot from absorption titration data of with (a)  $\text{Cd}^{\text{II}}$  and (b)  $\text{Pb}^{\text{II}}$  concentration.

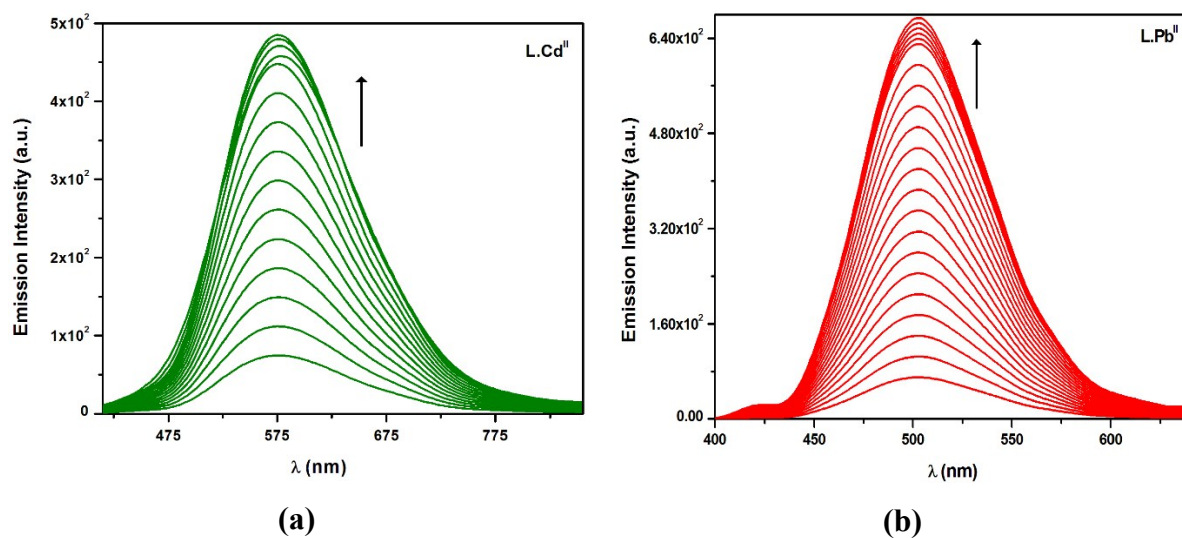

**Fig. S9.** Emission spectra of  $H_2L$  (10  $\mu M$ ) upon incremental addition of (a)  $Cd^{II}$  (0.0 – 5.0 equiv.) and (b)  $Pb^{II}$  (0.0 – 5.0 equiv.) in methanol/HEPES buffer (5 mM, pH 7.3; 1:9 v/v).

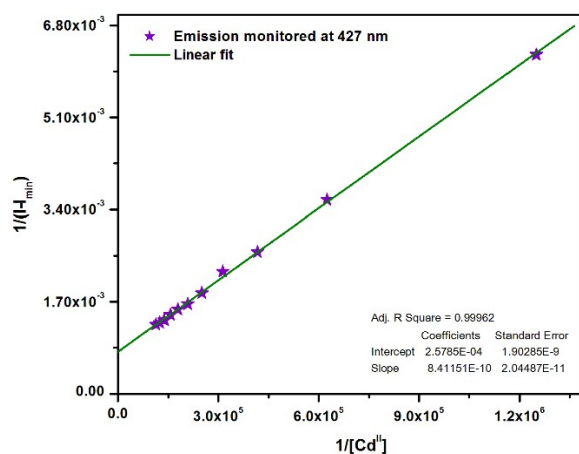

(a)

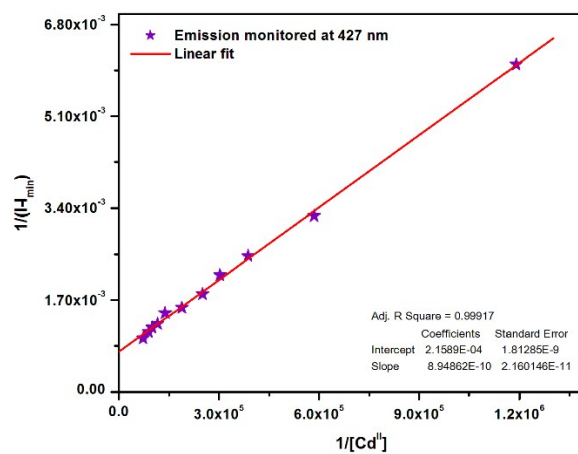

(b)

**Fig. S10.** B-H plot from emission titration data of with (a)  $\text{Cd}^{\text{II}}$  and (b)  $\text{Pb}^{\text{II}}$  concentration.

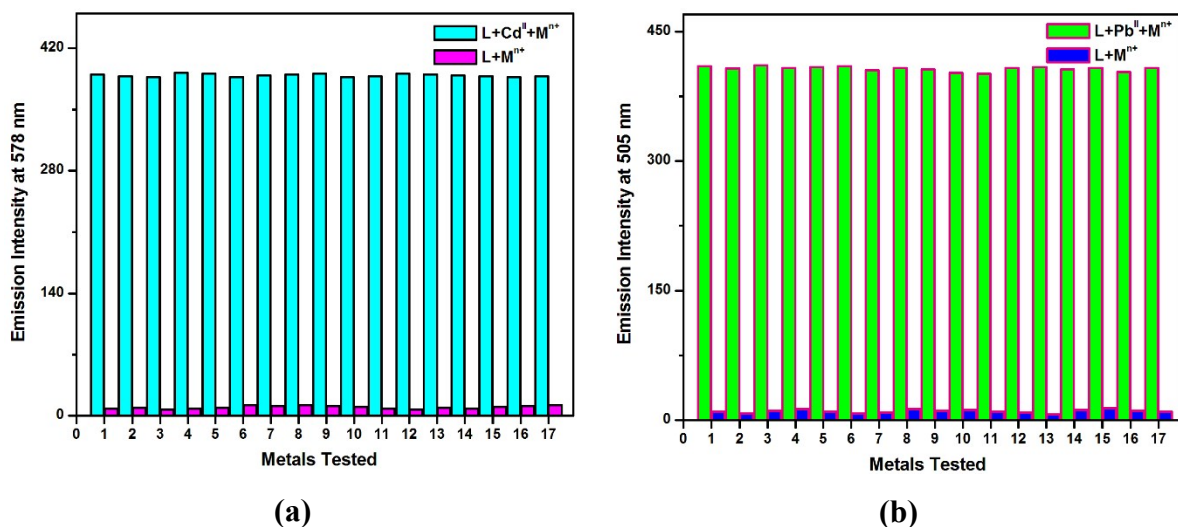

**Fig.S11.** Emission intensity of H<sub>2</sub>L (10 μM) with **(a)** Cd<sup>II</sup> in the presence of other metal ions in methanol/HEPES buffer (5 mM, pH 7.3; 1:9 v/v) at room temperature. (1) L+Cd<sup>II</sup>+Ag<sup>I</sup>, (2) L+Cd<sup>II</sup>+Zn<sup>II</sup>, (3) L+Cd<sup>II</sup>+Al<sup>III</sup>, (4) L+Cd<sup>II</sup>+Pb<sup>II</sup>, (5) L+Cd<sup>II</sup>+Mn<sup>II</sup>, (6) L+Cd<sup>II</sup>+Hg<sup>II</sup>, (7) L+Cd<sup>II</sup>+Mg<sup>II</sup>, (8) L+Cd<sup>II</sup>+Cu<sup>II</sup>, (9) L+Cd<sup>II</sup>+Fe<sup>II</sup>, (10) L+Cd<sup>II</sup>+Fe<sup>II</sup>, (11) L+Cd<sup>II</sup>+Co<sup>II</sup>, (12) L+Cd<sup>II</sup>+Ni<sup>II</sup>, (13) L+Cd<sup>II</sup>+Na<sup>I</sup>, (14) L+Cd<sup>II</sup>+VO<sup>II</sup>, (15) L+Cd<sup>II</sup>+Mn<sup>II</sup>, (16) L+Cd<sup>II</sup>+K<sup>I</sup>, (17) L+Cd<sup>II</sup>+Ca<sup>II</sup> and **(b)** Pb<sup>II</sup> in the presence of other metal ions in methanol/HEPES buffer (5 mM, pH 7.3; 1:9 v/v) at room temperature. (1) L+Pb<sup>II</sup>+Ag<sup>I</sup>, (2) L+Pb<sup>II</sup>+Zn<sup>II</sup>, (3) L+Pb<sup>II</sup>+Al<sup>III</sup>, (4) L+Pb<sup>II</sup>+Cd<sup>II</sup>, (5) L+Pb<sup>II</sup>+Mn<sup>II</sup>, (6) L+Pb<sup>II</sup>+Hg<sup>II</sup>, (7) L+Pb<sup>II</sup>+Mg<sup>II</sup>, (8) L+Pb<sup>II</sup>+Cu<sup>II</sup>, (9) L+Pb<sup>II</sup>+Fe<sup>II</sup>, (10) L+Pb<sup>II</sup>+Fe<sup>II</sup>, (11) L+Pb<sup>II</sup>+Co<sup>II</sup>, (12) L+Pb<sup>II</sup>+Ni<sup>II</sup>, (13) L+Pb<sup>II</sup>+Na<sup>I</sup>, (14) L+Pb<sup>II</sup>+VO<sup>II</sup>, (15) L+Pb<sup>II</sup>+Mn<sup>II</sup>, (16) L+Pb<sup>II</sup>+K<sup>I</sup>, (17) L+Pb<sup>II</sup>+Ca<sup>II</sup>.

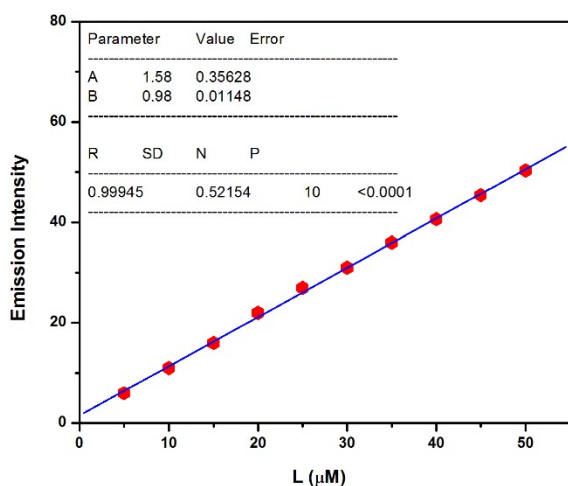

(a)

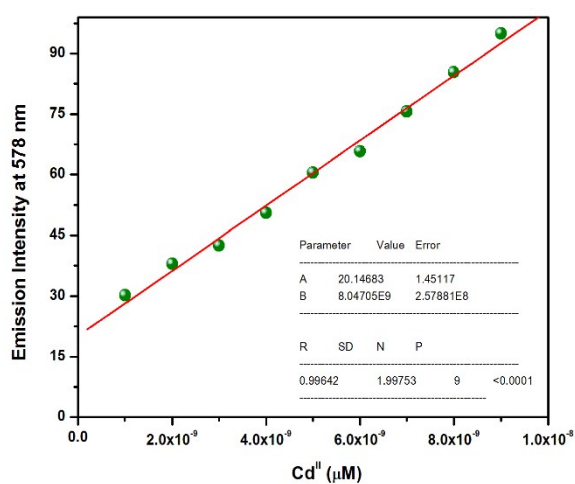

(b)

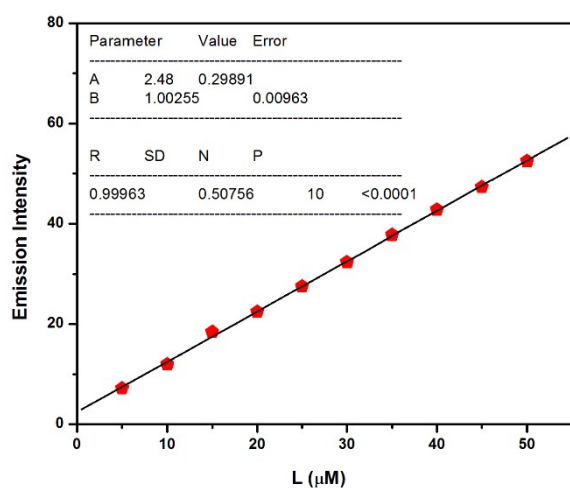

(c)

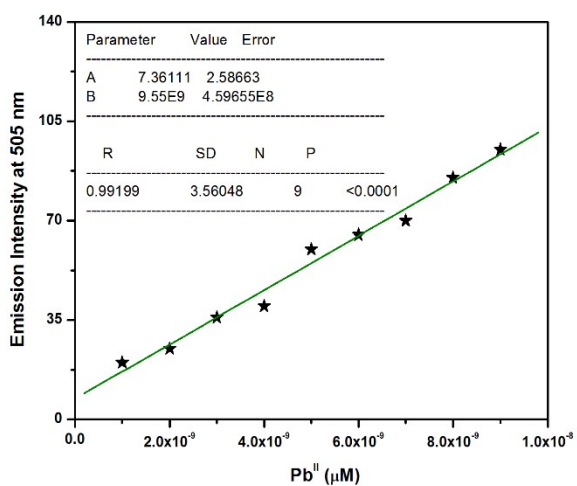

(d)

**Fig. S12.** (a) Determination of SbI of the blank,  $H_2L$  solution; (b) Linear dynamic plot of emission intensity (at 578 nm) vs.  $[Cd^{II}]$  for the determination of S (slope) and (c) Determination of SbI of the blank,  $H_2L$  solution; (d) Linear dynamic plot of emission intensity (at 505 nm) vs.  $[Pb^{II}]$  for the determination of S (slope);  $[H_2L] = 10 \mu M$ .

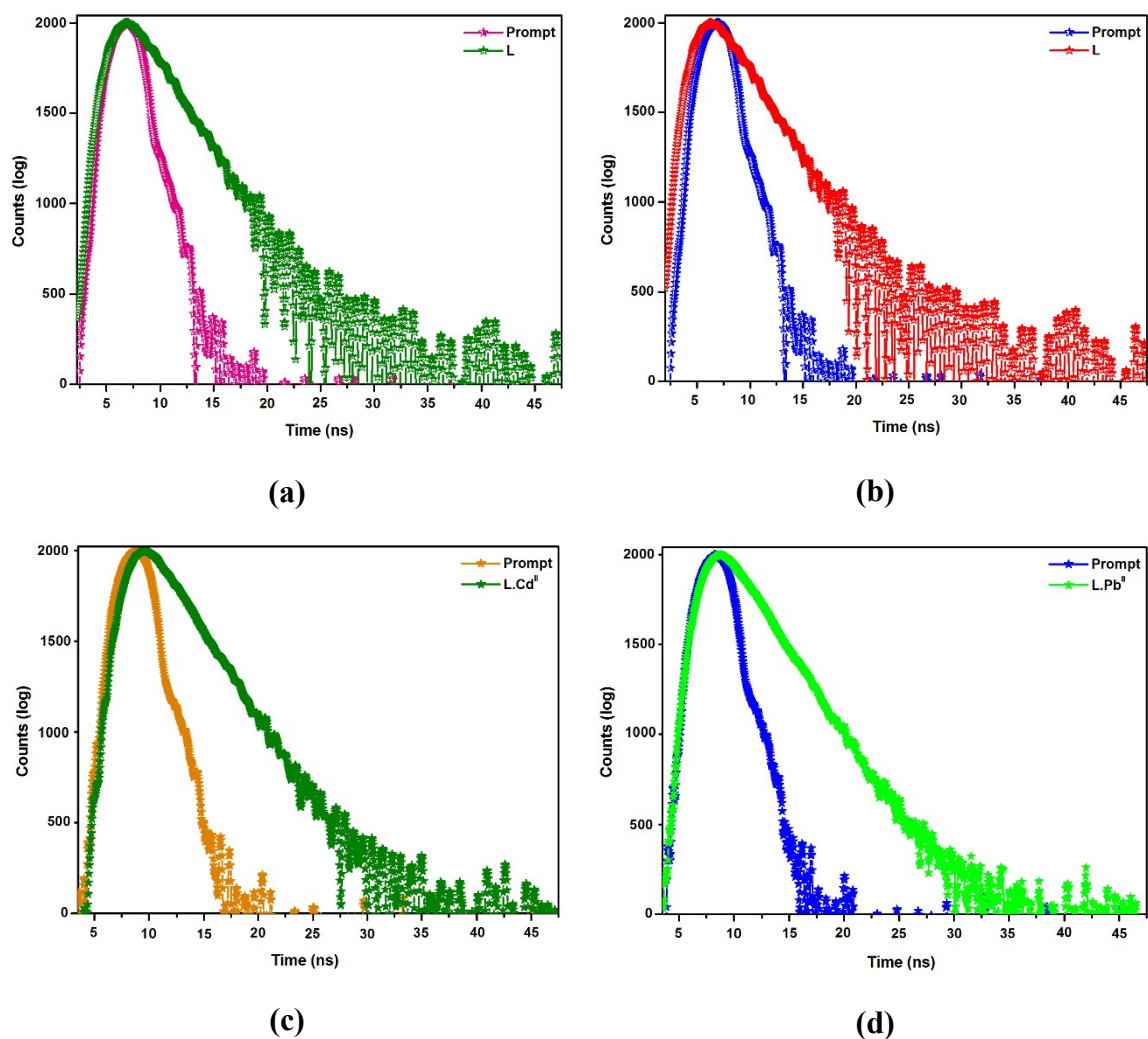

**Fig. S13.** Time-resolved fluorescence decay of **(a)** H<sub>2</sub>L (10 μM;  $\lambda_{\text{ex}} = 420$  nm); **(b)** H<sub>2</sub>L (10 μM;  $\lambda_{\text{ex}} = 410$  nm); **(c)** in presence of Cd<sup>II</sup> metal ions (5 equiv.;  $\lambda_{\text{ex}} = 420$  nm) and **(d)** in presence of Pb<sup>II</sup> metal ions (5 equiv.;  $\lambda_{\text{ex}} = 410$  nm) in acetonitrile/HEPES buffer (5 mM, pH 7.3; 1:9 v/v) at room temperature.

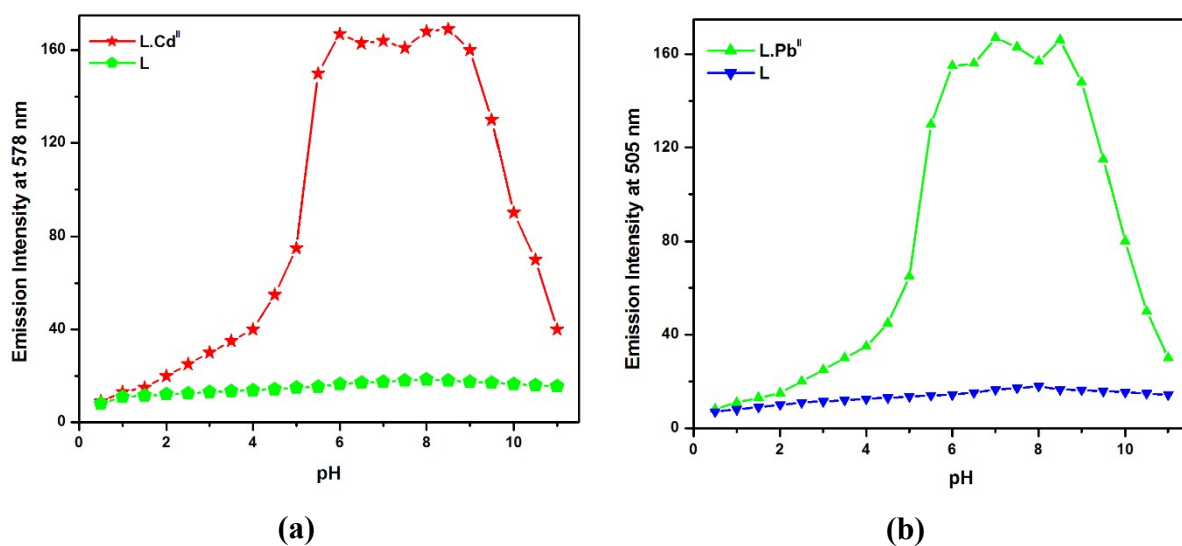

**Fig. S14.** Emission intensity of H<sub>2</sub>L in the presence of (a) Cd<sup>II</sup> ( $\lambda_{\text{em}} = 578 \text{ nm}$ ;  $\lambda_{\text{ex}} = 420 \text{ nm}$ ); (b) Pb<sup>II</sup> ( $\lambda_{\text{em}} = 505 \text{ nm}$ ;  $\lambda_{\text{ex}} = 410 \text{ nm}$ ) at various pH values in methanol/HEPES buffer (5 mM, pH 7.3; 1:9 v/v).



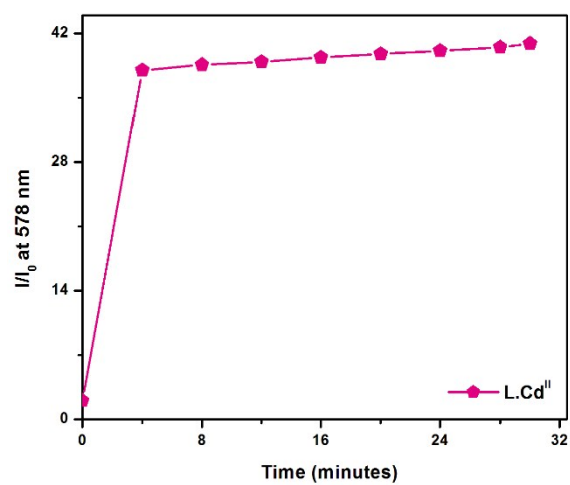

(a)

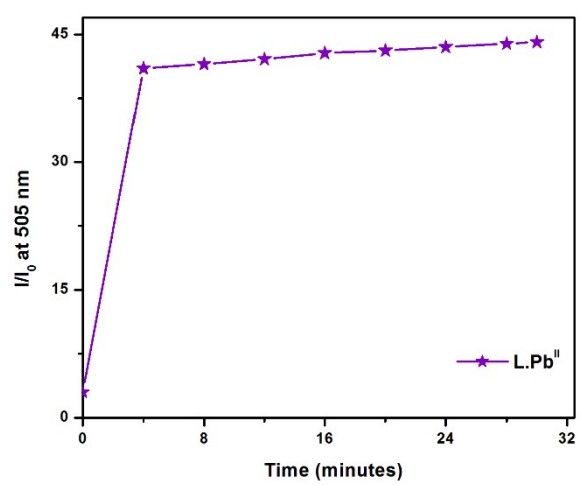

(b)

**Fig. S15.** Fluorescence intensity of (a)  $L.Cd^{II}$ ; (b)  $L.Pb^{II}$  as a function of time (0-30 minutes).

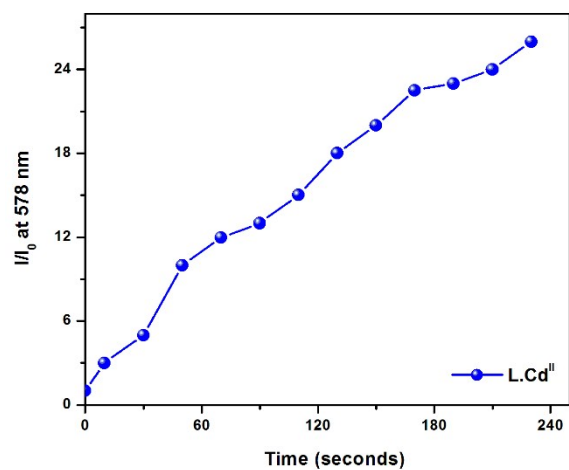

(a)

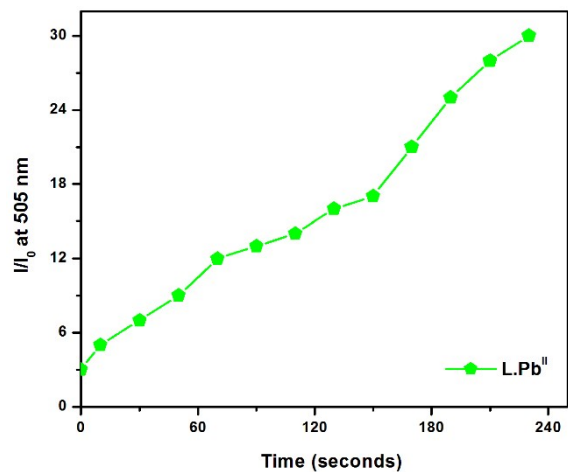

(b)

**Fig. S16.** Emission intensity of (a) L.Cd<sup>II</sup>; (b) L.Pb<sup>II</sup> as a function of time (seconds).

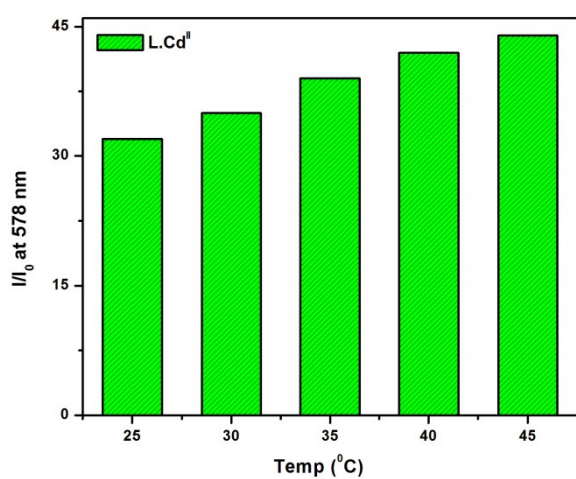

(a)

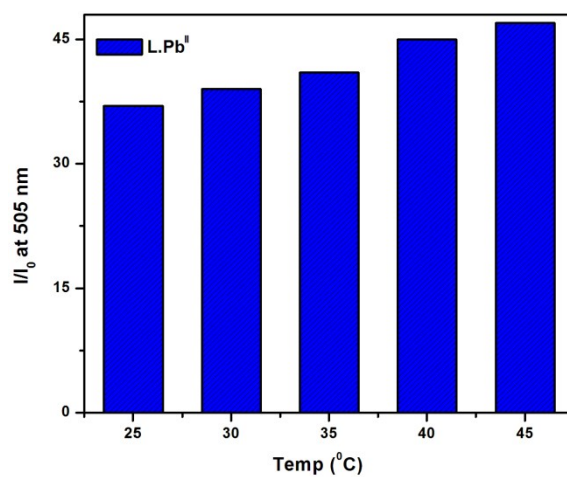

(b)

**Fig. S17.** Emission spectral changes of (a) L.Cd<sup>II</sup>; (b) L.Pb<sup>II</sup> as a function of temperature (25-45°C).

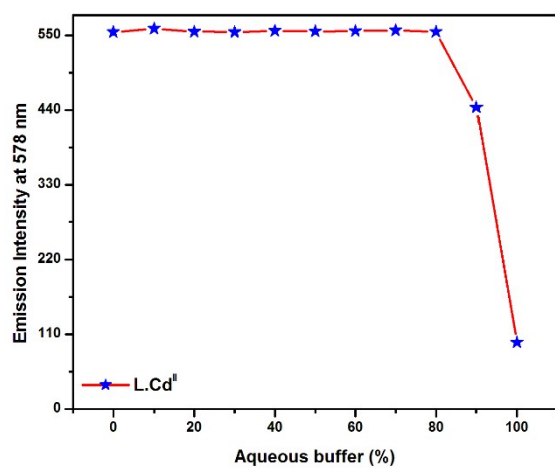

(a)

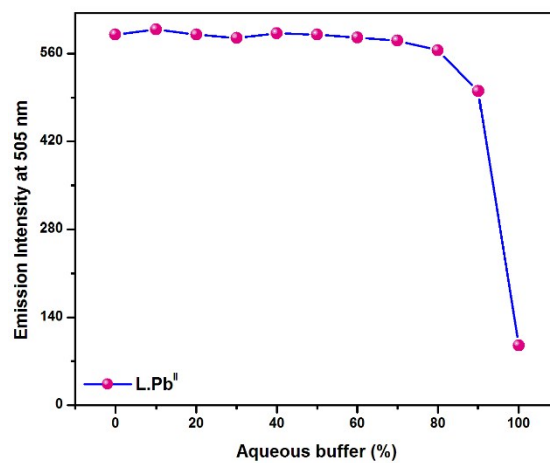

(b)

**Fig. S18.** Fluorescence intensity of (a) L.Cd<sup>II</sup>; (b) L.Pb<sup>II</sup> as a function of aqueous buffer concentration (0-99%).

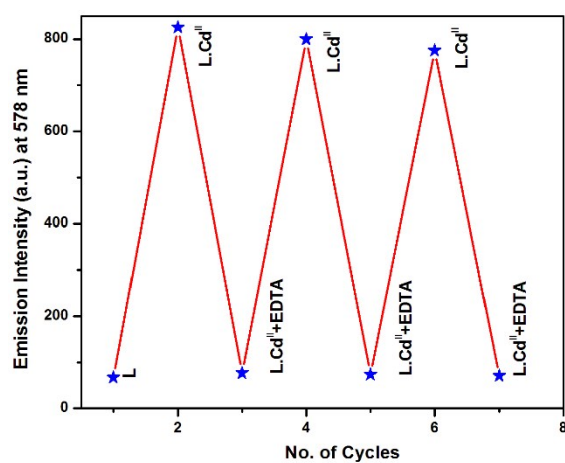

(a)

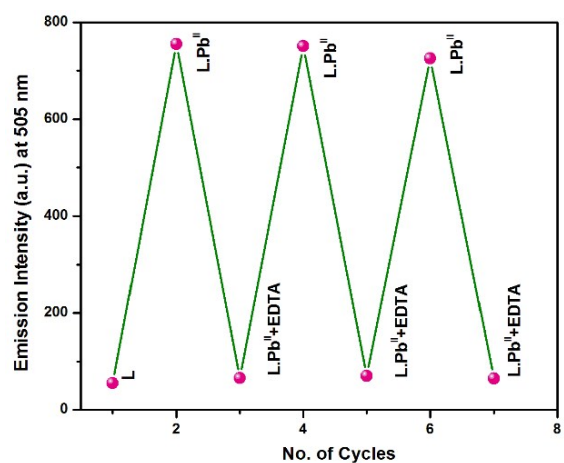

(b)

**Fig. S19.** (a) Emission intensities of L.Cd<sup>II</sup> (1:1) in the presence of EDTA for many cycles ( $\lambda_{\text{ex}} = 420 \text{ nm}$ ;  $\lambda_{\text{em}} = 578 \text{ nm}$ ); (b) Emission intensities of L.Pb<sup>II</sup> (1:1) in the presence of EDTA for many cycles ( $\lambda_{\text{ex}} = 410 \text{ nm}$ ;  $\lambda_{\text{em}} = 505 \text{ nm}$ ).

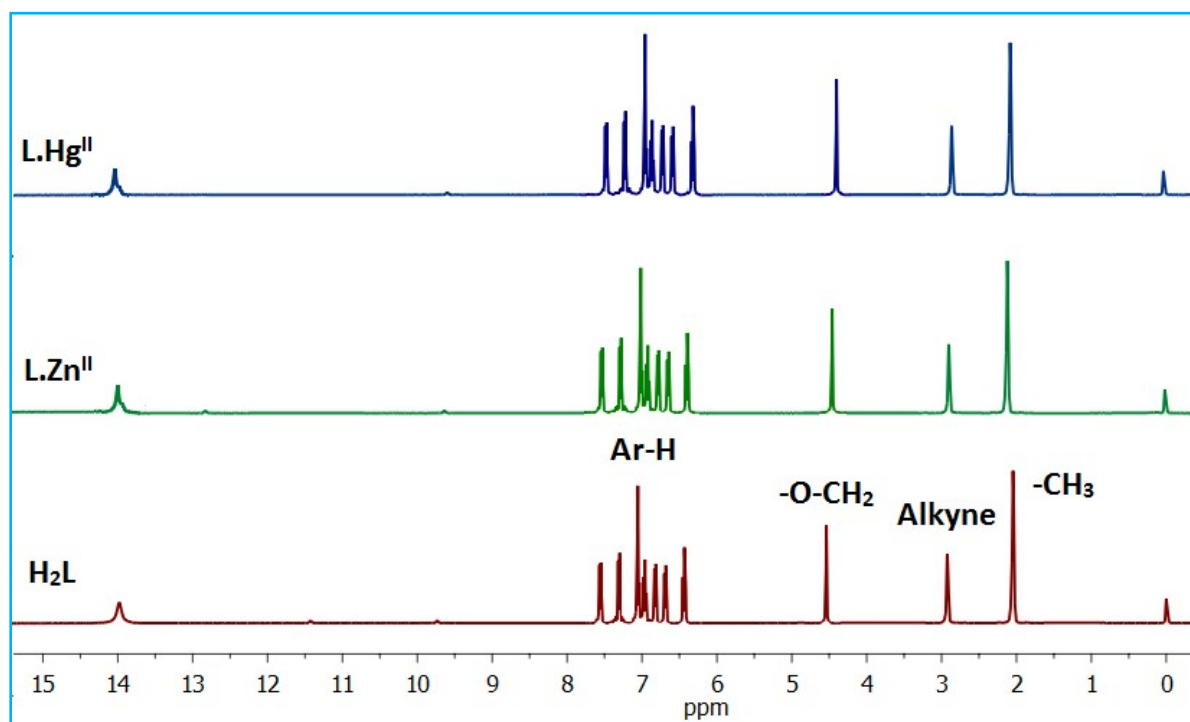

**Fig. S20.**  $^1\text{H}$  NMR spectra of  $\text{H}_2\text{L}$  in the absence and presence of  $\text{Zn}^{\text{II}}$  and  $\text{Hg}^{\text{II}}$  ions in  $\text{DMSO-d}_6$ .

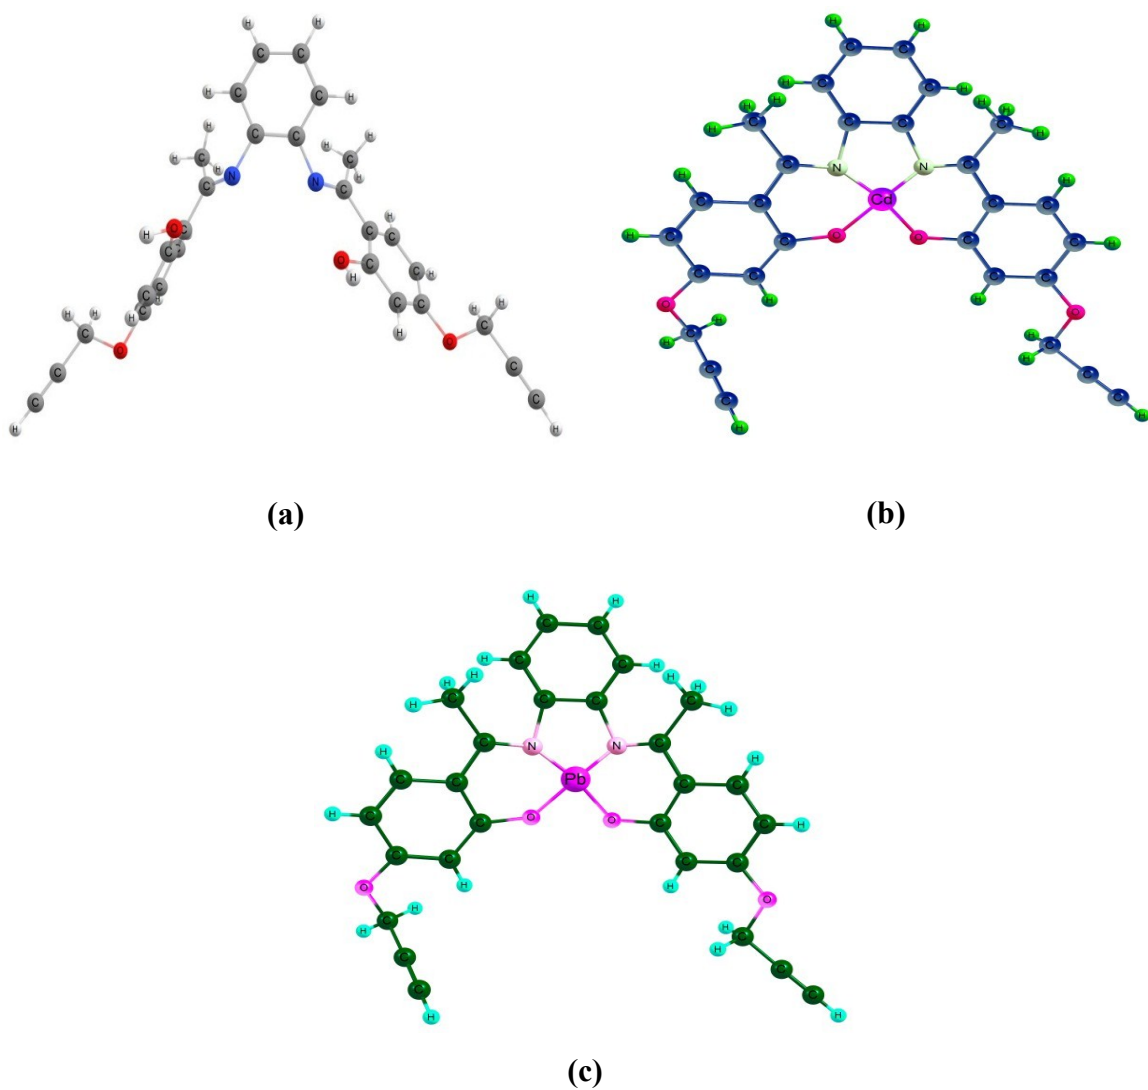

**Fig. S21.** Optimized geometry of (a)  $H_2L$ ; (b)  $L.Cd^{II}$  and (c)  $L.Pb^{II}$  using Gaussian 16 at B3LYP/6-311G(d,p) level of theory.

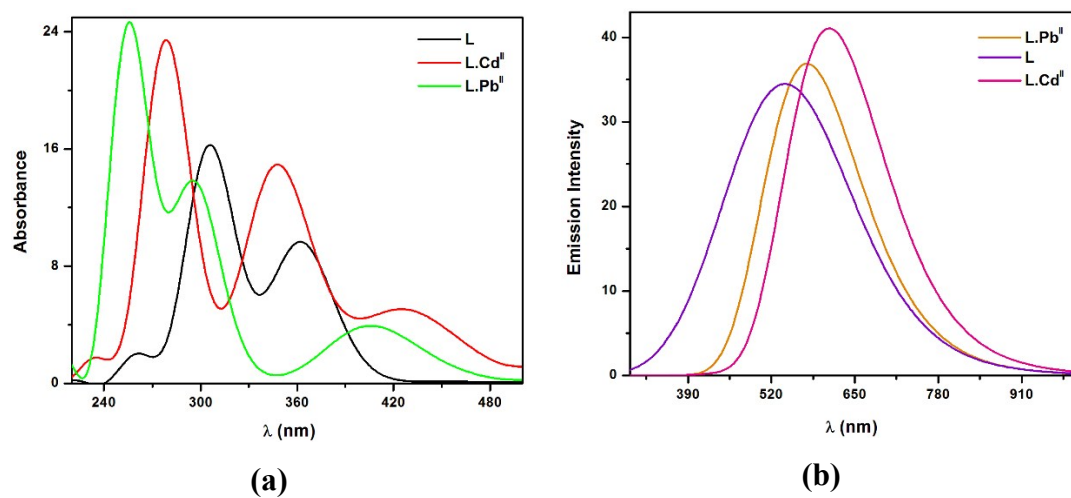

**Fig. S22.** (a) Absorption and (b) emission spectra for H<sub>2</sub>L with metal ions in the DFT method.



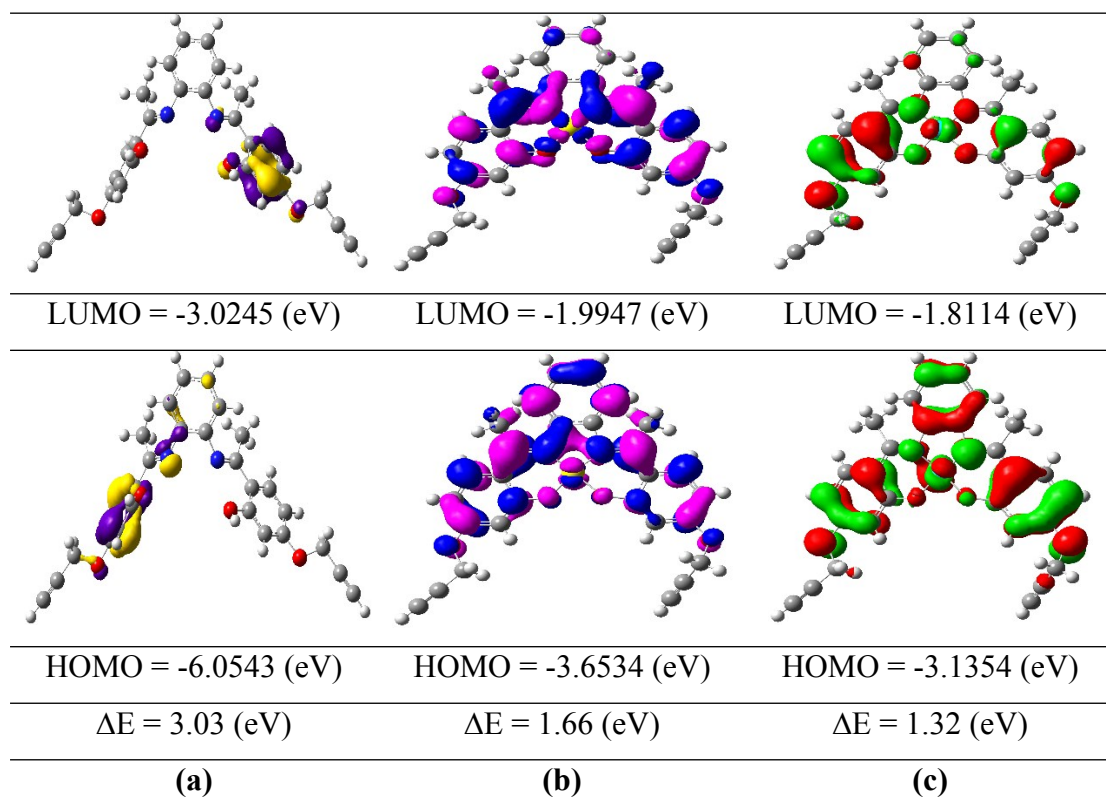

**Fig. S23.** FMO diagrams of (a)  $H_2L$ ; (b)  $L.Pb^{II}$  and (c)  $L.Cd^{II}$  with energy gap as calculated from the DFT method.

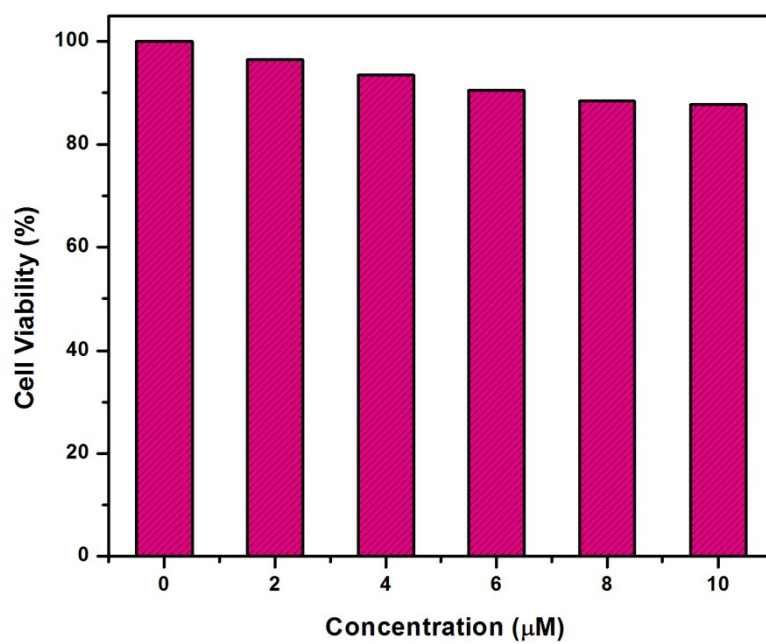

**Fig. S24.** Cell viability values (%) assessed by MTT proliferation test versus concentrations of H<sub>2</sub>L after 24 h incubation at 25°C.

## Binding of H<sub>2</sub>L with Cd<sup>II</sup> and Pb<sup>II</sup>

### a) By absorbance method

The L.M<sup>II</sup> (M = Cd and Pb) binding constant was measured using the Benesi-Hildebrand (B-H) plot.<sup>S1</sup>

$$1/(A - A_0) = a/(a - b) \{1/K_a[M] + 1\} \dots\dots\dots(1)$$

where  $A_0$  is absorbance of free L,  $A$  is absorbance of H<sub>2</sub>L with metal ions,  $K_a$  is the binding constant (M<sup>-1</sup>) and  $[M]$  is the concentration of metal ions added during titration. The association constant ( $K_a$ ) could be determined from the slope of the straight line of the plot of  $1/(A - A_0)$  vs.  $[1/M^{II}]$  and is found to be  $5.30 \times 10^5 \text{ M}^{-1}$  (L.Cd<sup>II</sup>) and  $4.80 \times 10^5 \text{ M}^{-1}$  (L.Pb<sup>II</sup>).

### b) By fluorescence method

Also the binding constant value of metal ions with H<sub>2</sub>L has been examined by fluorescence spectroscopic method using the modified Benesi-Hildebrand equation,

$$1/(I - I_0) = 1/\{K(I_{\max} - I_0)C\} + 1/(I_{\max} - I_0) \dots\dots\dots(2)$$

where  $I_0$  is the emission intensity of H<sub>2</sub>L in the absence of metal ions,  $I$  is the observed emission intensity at that particular wavelength in the presence of a certain concentration of the metal ion (C),  $I_{\max}$  is the maximum fluorescence intensity value that was obtained during the titration with varying metal ion concentration,  $K$  is the binding constant (M<sup>-1</sup>) and was determined from the slope of the linear plot and C is the concentration of the metal ions added during titration and is found to be  $3.10 \times 10^5 \text{ M}^{-1}$  (L.Cd<sup>II</sup>) and  $2.40 \times 10^5 \text{ M}^{-1}$  (L.Pb<sup>II</sup>).

### **Job Plot Method**

The compound, H<sub>2</sub>L (0.01M) was dissolved in methanol/HEPES buffer (5 mM, pH 7.3; 1:9v/v). 100, 90, 80, 70, 60, 50, 40, 30, 20, 10 and 0  $\mu$ L of the solution of H<sub>2</sub>L were taken and transferred to 5.0 ml bottles. Every bottle was diluted with water to make a total volume of 4.0 ml. Metal ions (0.01M) were dissolved in water. 0, 10, 20, 30, 40, 50, 60, 70, 80, 90 and 100  $\mu$ L of the metal ion solution were added to each diluted solution of H<sub>2</sub>L. Each bottle had a total volume of 5.0 ml. After shaking them for 5 minutes, absorption spectra were taken at room temperature. Job's plots were drawn by plotting  $\Delta I \cdot X_h$  vs.  $X_h$ , where  $\Delta I$  = change of absorbance at 349 nm during titration and  $X_h$  is the mole fraction of metal ions).

## pH Study

The pH titrations were done in an automatic potentiometric titrator (HANNA-HI-902, USA) at 310 K with a combined glass electrode (accuracy  $\pm 0.01$  pH unit). The instrument was calibrated using standard buffer solutions.<sup>S2</sup> The ionic strength of each solution was adjusted to 0.10 M with NaClO<sub>4</sub> as the supporting electrolyte. The ion product of water ( $K = [H^+][OH^-]$ ) at 0.10 M NaClO<sub>4</sub> in methanol/HEPES buffer (5 mM, pH 7.3; 1:9 v/v) mixture was calculated based on the measurement of  $[H^+]$  and  $[OH^-]$  and pH in several experiments. The nitrogen gas was bubbled through the solution before and during titrations. Multiple titrations were carried out for each system. The dissociation constants ( $pK_a$ ) of H<sub>2</sub>L were obtained from its solutions of concentration ranging from  $1.0 \times 10^{-3}$  to  $3.0 \times 10^{-3}$  M. The  $pK_a$  values were calculated with the help of the MINQUAD-75 program. The concentration distribution profiles were obtained<sup>S3</sup> with HYSS.

### Determination of quantum yield

The fluorescence quantum yield ( $\Phi_x$ ) for H<sub>2</sub>L and L.M<sup>II</sup> (M = Cd and Pb) was measured at room temperature using standard solutions of fluorescein ( $\Phi_x = 0.79$ ) in basic methanol at an excitation wavelength 441 nm. The quantum yield was determined by the following eqn,

$$\Phi_x = \Phi_{st} \cdot (A_{st}/A_x) \cdot (F_x/F_{st}) \cdot (n_x^2/n_{st}^2) \cdot (D_x/D_{st})$$

where,  $\Phi_x$  is the quantum yield of the sample,  $\Phi_{st}$  is the quantum yield of the reference,  $A_x$  and  $A_{st}$  are the absorbances of the sample and the reference,  $F_x$  and  $F_{st}$  are the areas of emission for the sample and the reference,  $n_x^2$  and  $n_{st}^2$  are the refractive indexes of the solvents and  $D_x$  and  $D_{st}$  is the dilution factor of the sample and reference respectively.

#### Calculation:

##### For Cd<sup>II</sup>

$\Phi_{st} = 0.79$ ,  $A_{st} = 441$  nm,  $A_x = 415$  nm,  $F_x = 65452.2$ ,  $F_{st} = 204536.6$ ,  $(n) = 1.3335$ ,  $D_x = 0.002$  and  $D_{st} = 0.003$

$$\Phi_x = 0.79 \cdot (441/415) \cdot (65452.2/204536.6) \cdot (1.3335/1.3335) \cdot (0.002/0.003)$$

$$\Phi_x = 0.2869$$

##### For Pb<sup>II</sup>

$\Phi_{st} = 0.79$ ,  $A_{st} = 441$  nm,  $A_x = 405$  nm,  $F_x = 63541.2$ ,  $F_{st} = 197825.6$ ,  $(n) = 1.3349$ ,  $D_x = 0.002$  and  $D_{st} = 0.003$

$$\Phi_x = 0.79 \cdot (441/405) \cdot (63541.2/197825.6) \cdot (1.3349/1.3349) \cdot (0.002/0.003)$$

$$\Phi_x = 0.1842$$

##### For H<sub>2</sub>L

$\Phi_{st} = 0.79$ ,  $A_{st} = 441$  nm,  $A_x = 349$  nm,  $F_x = 25122.7$ ,  $F_{st} = 189874.8$ ,  $(n) = 1.3252$ ,  $D_x = 0.002$  and  $D_{st} = 0.003$

$$\Phi_x = 0.79 \cdot (441/349) \cdot (25122.7/189874.8) \cdot (1.3252/1.3252) \cdot (0.002/0.003)$$

$$\Phi_x = 0.0880$$



## Reversibility Test

The reversible performance of proposed sensor has been proving with EDTA disodium salt. The ligand, L (10  $\mu$ M) was dissolved in methanol (1.0 mL) and 4.0 mL of the metal ion solution mixed with 1.0 mL solution of L. After mixing it for 2 minutes, the fluorescence spectra were taken at room temperature. EDTA (0.5 mmol) was dissolved in 5.0 mL of water and 2.0 mL of the EDTA solution were added to the solution of the L.M<sup>II</sup> (M = Cd and Pb) complex. After mixing it for 2 minutes, fluorescence spectra were taken at room temperature. The disodium salt of EDTA is a heavy metal ion chelator, leads to quenching the emission intensity of L.M<sup>II</sup> complex, indicating that L reversibly coordinates to metal ions.



**Table S1.** Emission lifetime of H<sub>2</sub>L (10  $\mu$ M) and its complexes Cd<sup>II</sup> and Pb<sup>II</sup> ion in acetonitrile/HEPES buffer (5 mM, pH 7.3; 1:9 v/v)

|                             | $\tau$ (ns) | $\chi^2$ |
|-----------------------------|-------------|----------|
| H <sub>2</sub> L (420 nm)   | 7.54        | 1.09815  |
| H <sub>2</sub> L (410 nm)   | 5.99        | 1.07124  |
| L.Cd <sup>II</sup> (420 nm) | 9.67        | 1.11829  |
| L.Pb <sup>II</sup> (410 nm) | 8.85        | 1.10911  |

**Table S2.** Comparison of  $\lambda_{\text{abs}}$  and  $\lambda_{\text{em}}$  of the metal complex along with oscillator strength as observed in experimental and theoretical calculations.

|                    | <b>Experimental<br/>(nm)</b> | <b>Theoretical<br/>(nm)</b> | <b>Oscillator<br/>strength (<i>f</i>)</b> |
|--------------------|------------------------------|-----------------------------|-------------------------------------------|
| Absorption         |                              |                             |                                           |
| H <sub>2</sub> L   | 266, 349                     | 320, 375                    | 0.00011                                   |
| L.Cd <sup>II</sup> | 265, 311, 366, 415           | 257, 389, 432               | 0.00035                                   |
| L.Pb <sup>II</sup> | 281, 309, 395                | 248, 299, 398               | 0.00027                                   |
| Emission           |                              |                             |                                           |
| H <sub>2</sub> L   | 488                          | 495                         | 0.0031                                    |
| L.Cd <sup>II</sup> | 578                          | 603                         | 0.0073                                    |
| L.Pb <sup>II</sup> | 505                          | 566                         | 0.0064                                    |

## REFERENCES

- [S1] (a) H. A Benesi and J. H. Hildebrand, *J. Am. Chem. Soc.*, 1949, **71**, 2703-2707; (b) A. Mallick and N. Chattopadhyay, *Photochem. Photobiol.*, 2005, **81**, 419-424; (c) P. Roy, K. Dhara, M. Manassero, J. Ratha and P. Banerjee, *Inorg. Chem.*, 2007, **46**, 6405-6412.
- [S2] H. M. Irving, M. G. Miles and L. D. Pettit, *Anal. Chim. Acta*, 1967, **38**, 475-488.
- [S3] L. Alderighi, P. Gans, A. Ienco, D. Peters, A. Sabatini and A. Vacca, *Coord. Chem. Rev.*, 1999, **184**, 311.
